# Supplementary material for: Functionalized C@TiO2hollow spherical architecture for multifunctional applications
Source: Royal Society of Chemistry journal article supplement (doi:10.1039/c5dt05011a), 2016-01-01
Supplement: c5dt05011a1.pdf [file c5dt05011a1.pdf]

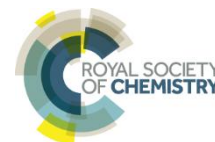

## Electronic Supplementary Information (ESI)

# Functionalized C@TiO<sub>2</sub> hollow spherical architectures for multifunctional applications

Shreyasi Chattopadhyay, Manish Kr Mishra and Goutam De\*

Nano-Structured Materials Division, CSIR-Central Glass and Ceramic Research Institute, Council of Scientific and Industrial Research, 196, Raja S. C. Mullick Road, Kolkata 700032, India.

## SI.1 DSSC fabrication with THS

Fluorine doped tin oxide (FTO) coated glass substrate with sheet resistance  $15 \Omega \text{ cm}^{-2}$  (TechInstro, India) was thoroughly cleaned with detergent, de-ionized (DI) water and ethanol. It was then dried at  $100^\circ\text{C}$  for 30 min. To fabricate the photoanode film, a paste was prepared with the calcined THS powder along with ethyl cellulose as binder and ethanol as solvent following the procedure reported by Grätzel et al.<sup>51</sup> The viscous TiO<sub>2</sub> paste was uniformly spread over the FTO by doctor blading technique. It was then heated at  $150^\circ\text{C}$  for 30 min followed by sintered at  $450^\circ\text{C}$  for another 30 min. The same process was repeated to get the film of proper thickness ( $\sim 6\text{--}7 \mu\text{m}$ ) for effective light absorption. The active area of the cell was  $0.08 \text{ cm}^2$  ( $0.4 \times 0.2 \text{ cm}^2$ ). The prepared film was then soaked with N719 dye solution for 24 h at room temperature. The Pt coated FTO counter electrode was prepared by drop casting 5 mM ethanol solution of hexachloroplatinic acid (H<sub>2</sub>PtCl<sub>6</sub>) solution followed by annealing it at  $450^\circ\text{C}$  for 30 min. These two electrodes were assembled in sandwich form and clamped firmly using binder clips. The space between two electrodes was filled up with electrolyte solution containing 0.03 (M) I<sub>2</sub>, 0.05 (M) LiI and 0.3 (M), 1, 2-dimethyl-3-propylimidazolium iodide in acetonitrile.

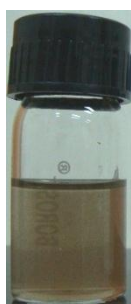

**Fig. S1** Digital image showing the ethanol dispersion of  $C^F@THS$  under normal light.

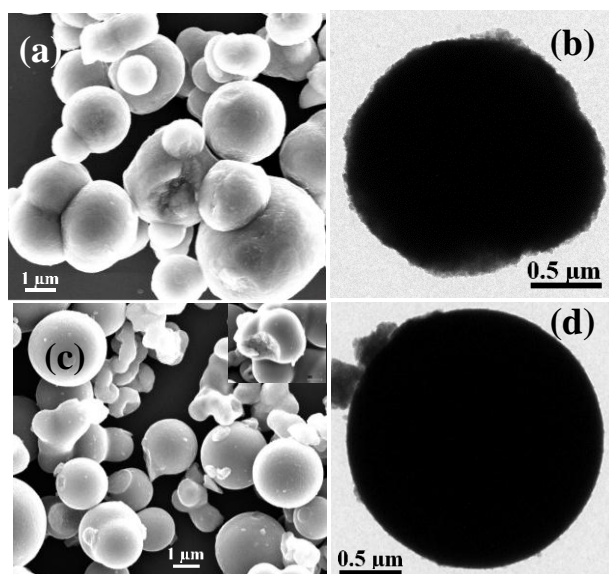

**Fig. S2** Electron microscopic images (FESEM and TEM) of  $CA-TiO_2$  (a, b) and  $TU-TiO_2$  (c, d) showing the formation of non-hollow spheres.

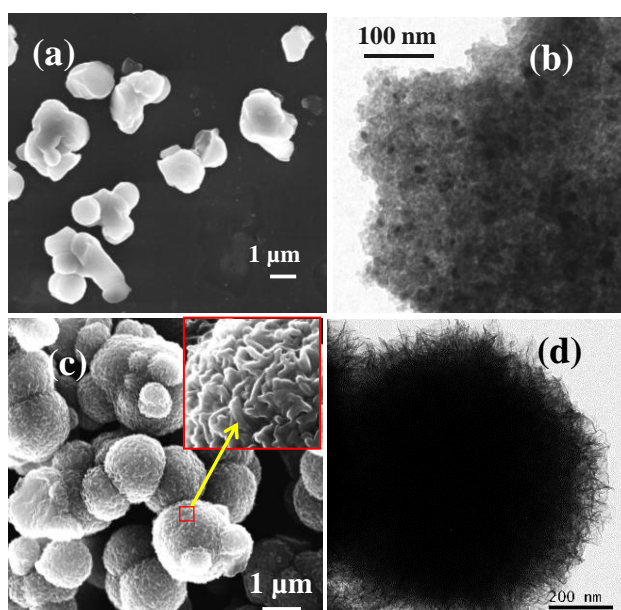

**Fig. S3** Time dependent FESEM and TEM studies towards the growth of C<sup>F</sup>@THS after 1.5 h (a, b) and 5 h (c, d).

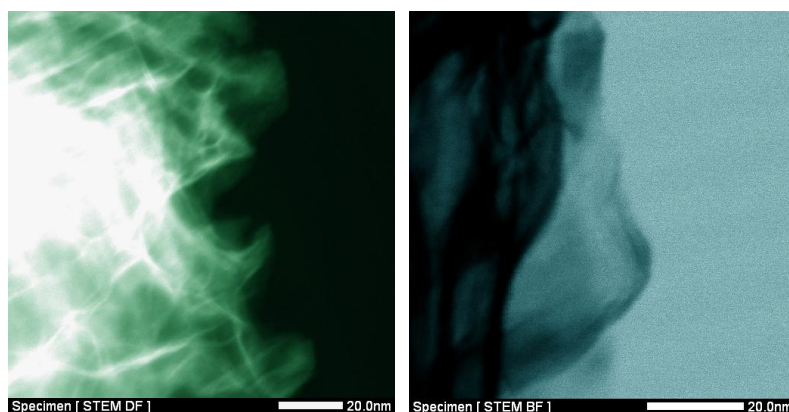

**Fig. S4** STEM images of as prepared C<sup>F</sup>@THS showing the stacking of nanoflakes/sheets to form the hollow architecture.

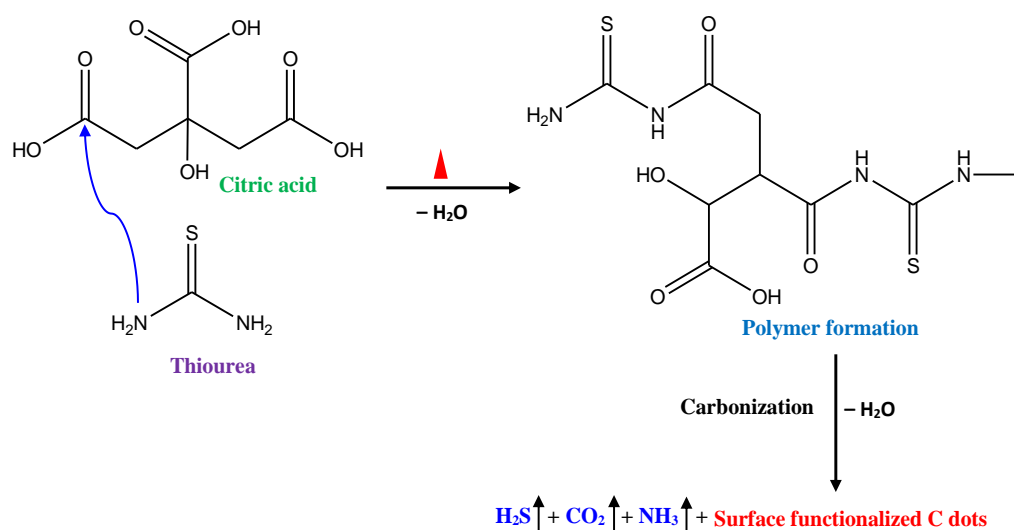

**Fig. S5** Reaction under the hydrothermal conditions between citric acid and thiourea produces functionalized C dots and different gaseous products.

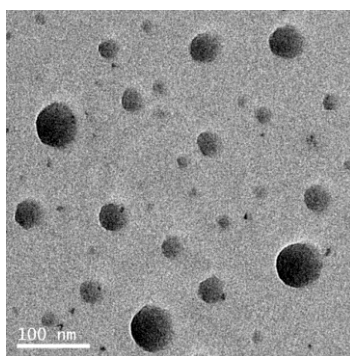

**Fig. S6** TEM image of the filtrate part of the hydrothermal product C<sup>F</sup>@THS showing the presence of C dots.

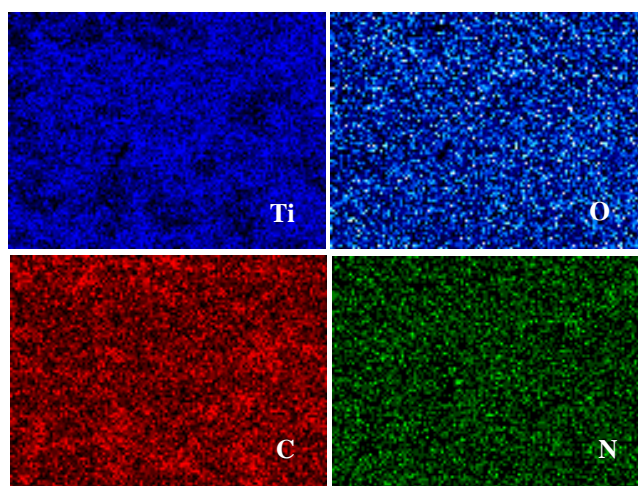

**Fig. S7** EDS area mapping of C<sup>F</sup>@THS showing the uniform distribution of the elements present.

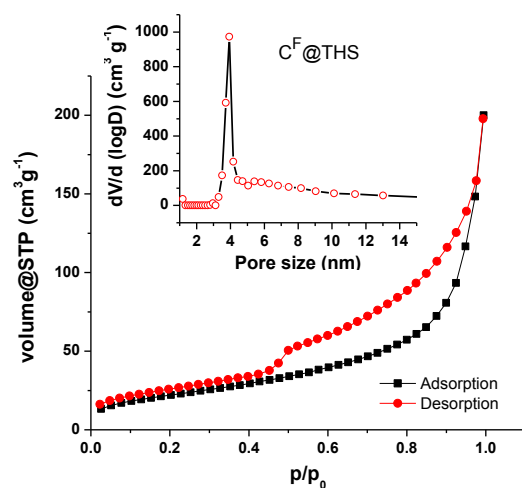

**Fig. S8** N<sub>2</sub> adsorption-desorption isotherms and pore size distribution (inset) of C<sup>F</sup>@THS

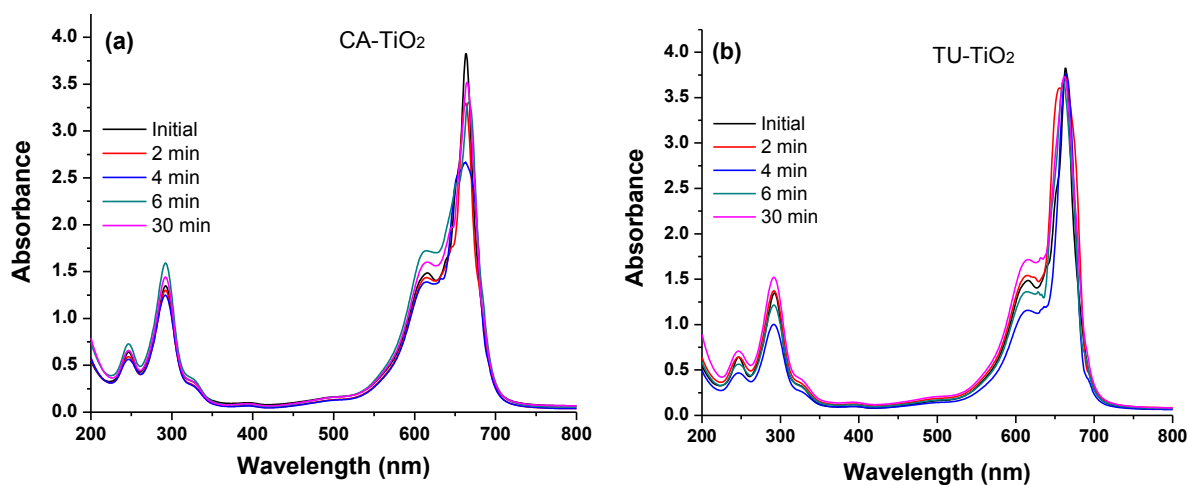

**Fig. S9** UV-vis spectral studies of MB adsorption by (a) CA-TiO<sub>2</sub> and (b) TU-TiO<sub>2</sub>.

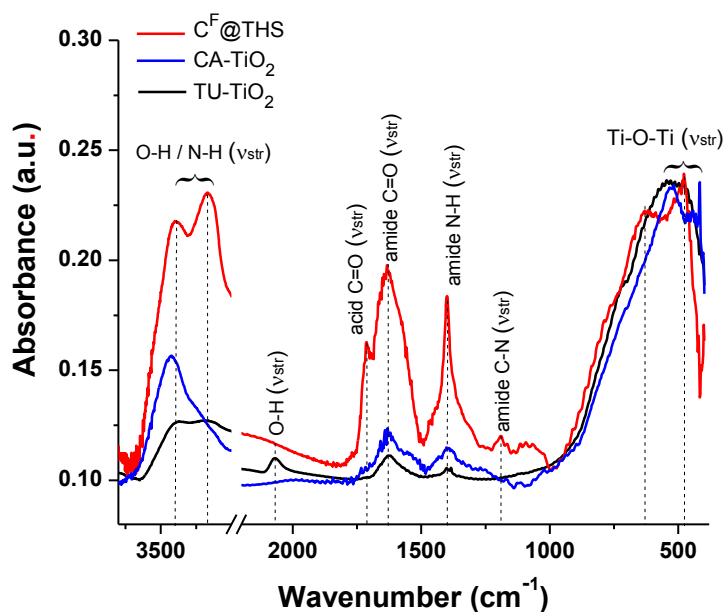

**Fig. S10** A comparative FTIR analyses of  $C^F@THS$ ,  $CA-TiO_2$  and  $TU-TiO_2$ . The study reveals significantly low content of functional groups with  $TU-TiO_2$  and  $CA-TiO_2$  in compare to  $C^F@THS$ . The spectra are normalized with respect to the  $Ti-O-Ti$  absorbance peak.

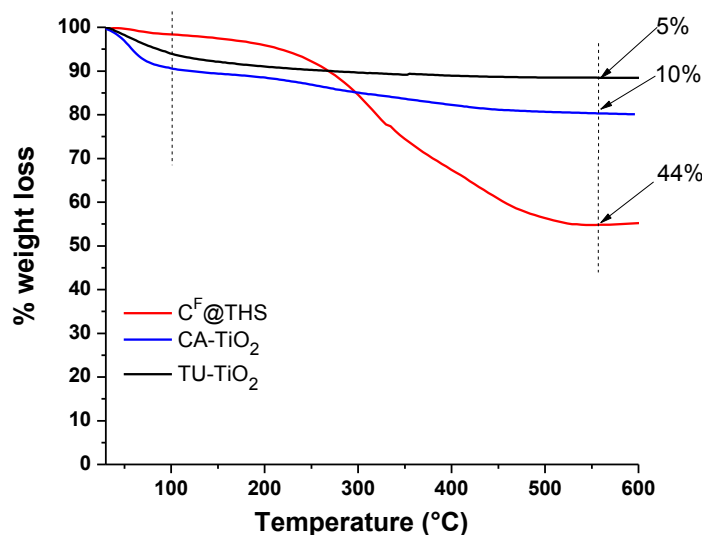

**Fig. S11** Thermogravimetric analyses (TGA) of  $C^F@THS$ ,  $CA-TiO_2$  and  $TU-TiO_2$ . The study shows significantly less weight loss of  $TU-TiO_2$  and  $CA-TiO_2$  in compare to  $C^F@THS$ . Initial weight losses up to 100 °C are due to the elimination of adsorbed water. The loss of water was not considered in the indicated weight losses (5, 10 and 44%) of the respective samples.

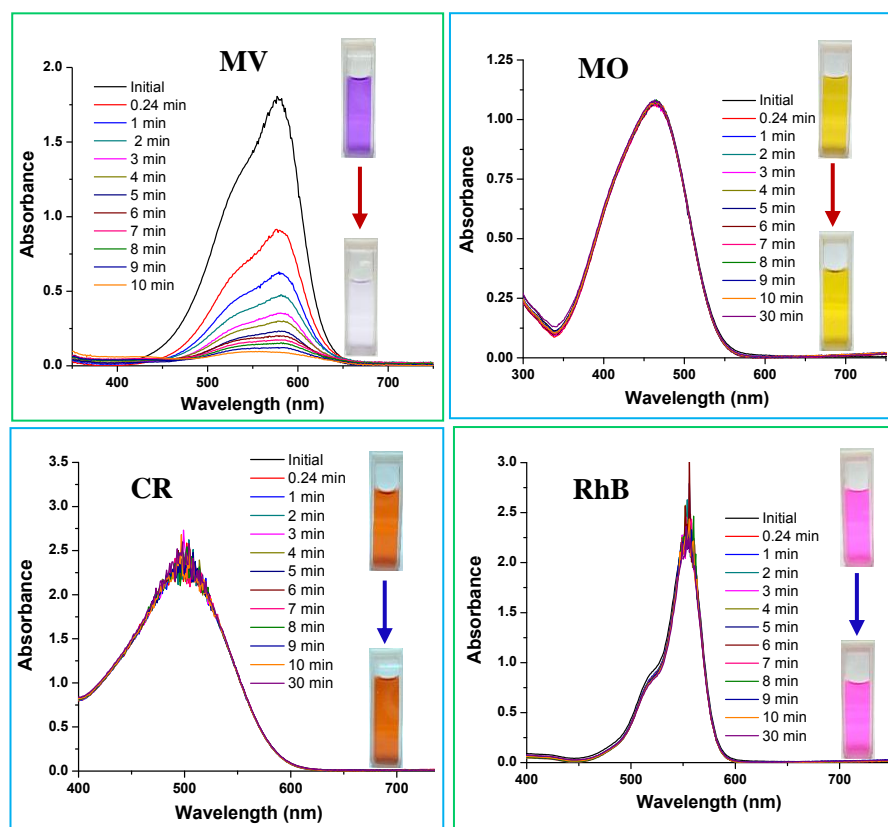

**Fig. S12** Control experiments on the dye adsorptions using MV, MO, CR ( $0.50 \times 10^{-4}$  M) and RhB ( $2.5 \times 10^{-5}$  M) by  $C^F$ @THS. Optical absorption spectra at different time intervals and the digital photos (in the insets) of the initial and final dye solutions are shown.

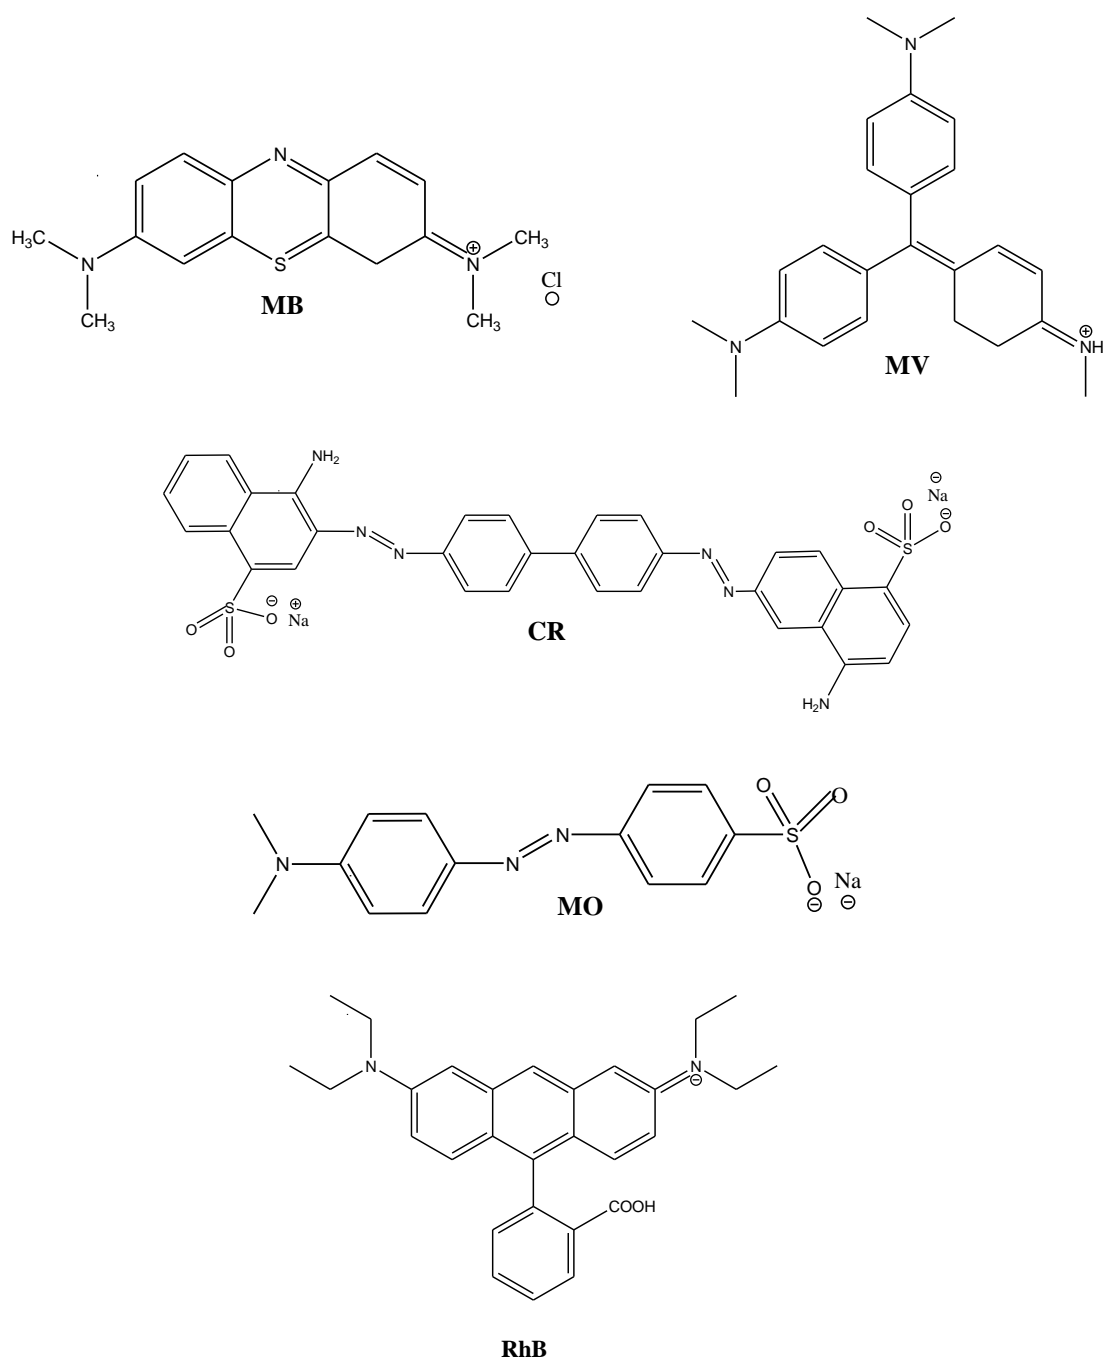

**Fig. S13** Chemical structures of the dyes used for adsorption studies.

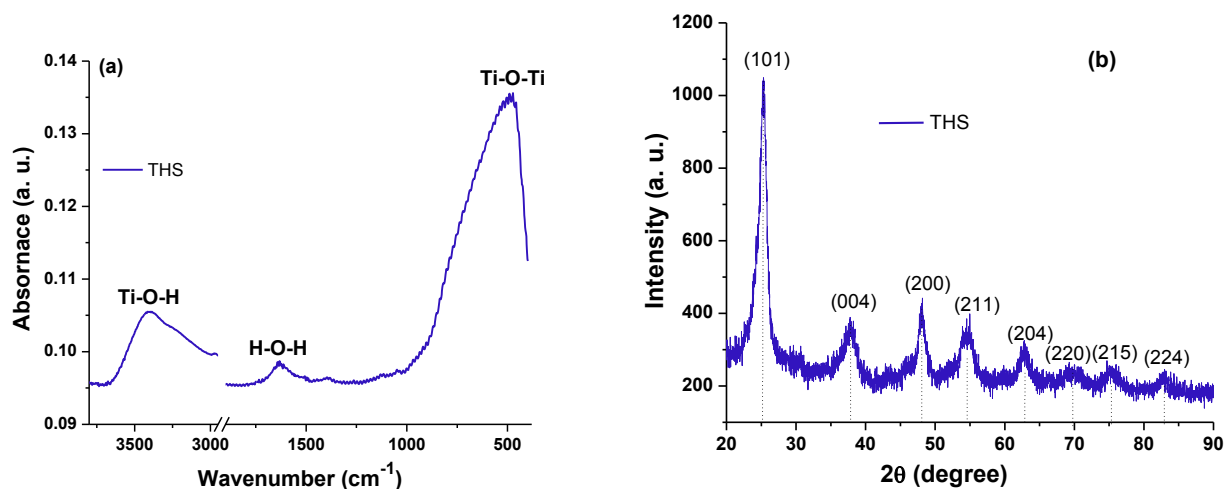

**Fig. S14** (a) FTIR spectrum and (b) XRD pattern of THS obtained after calcination of dye adsorbed  $\text{C}^{\text{F}}@\text{THS}$ . O-H stretching peak shown in (a) is originated from Ti-O-H groups with some contribution of adsorbed water.

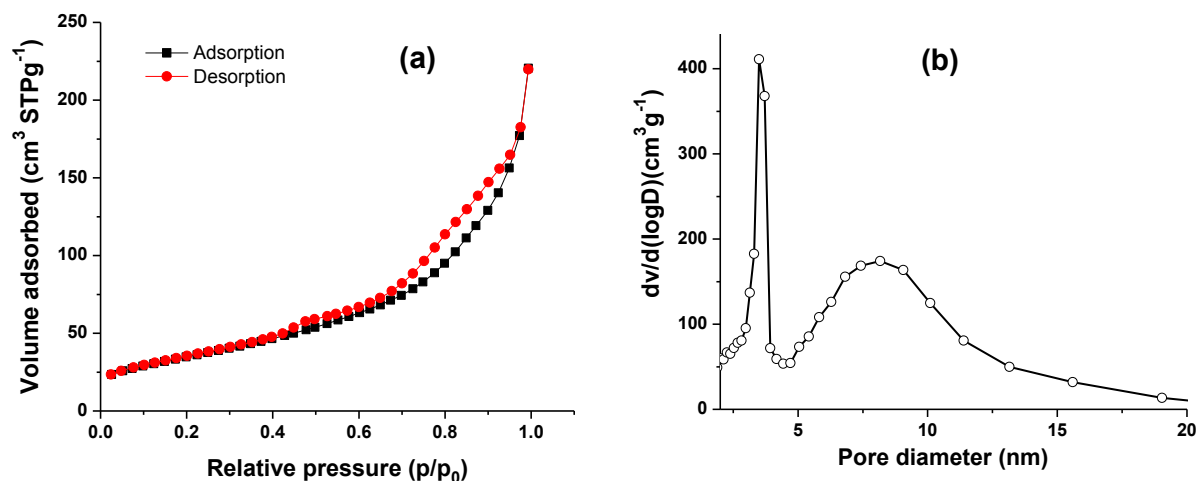

**Fig. S15** (a)  $\text{N}_2$  adsorption-desorption isotherm of THS and (b) its pore size distribution obtained from desorption branch of isotherm.

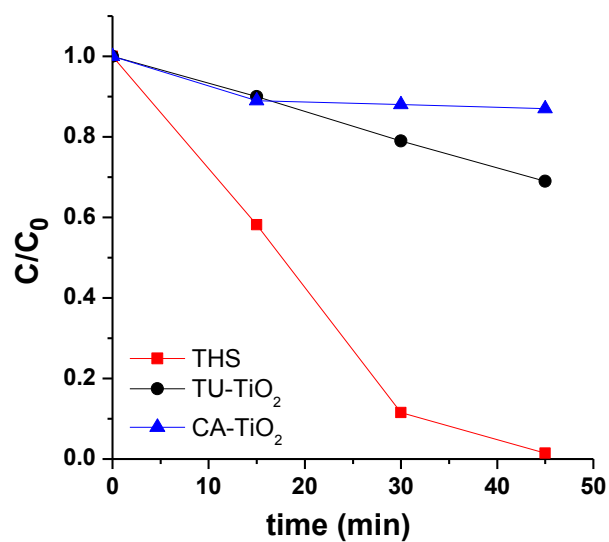

**Fig. S16** Comparative study showing the photodegradation of MB using THS, TU-TiO<sub>2</sub> and CA-TiO<sub>2</sub> under UV-A ( $\lambda=365$  nm) irradiation.
